# Supplementary material for: High Time Resolution Source Apportionment of PM 2.5 in Beijing with Multiple Models
Source: Copernicus journal article supplement (doi:10.5194/acp-2018-1234), 2018-12-03
Supplement: Supplementary file 1 [file acp-2018-1234-supplement.pdf]

# High-time Resolution Source Apportionment of PM<sub>2.5</sub> in Beijing with Multiple Models

Yue Liu<sup>1</sup>, Mei Zheng<sup>1,\*</sup>, Mingyuan Yu<sup>1</sup>, Xuhui Cai<sup>1</sup>, Huiyun Du<sup>2,3</sup>, Jie Li<sup>2</sup>, Tian Zhou<sup>1</sup>, Caiqing Yan<sup>1</sup>, Xuesong Wang<sup>1</sup>, Zongbo Shi<sup>4,5</sup>, Roy M. Harrison<sup>4,6</sup>, Qiang Zhang<sup>7</sup>, Kebin He<sup>7</sup>

<sup>1</sup> SKL-ESPC and BIC-ESAT, College of Environmental Sciences and Engineering, Peking University, Beijing 100871, China

<sup>2</sup> State Key Laboratory of Atmospheric Boundary Layer Physics and Atmospheric Chemistry, Institute of Atmospheric Physics, Chinese Academy of Sciences, Beijing 100029, China

<sup>3</sup> Center for Excellence in Urban Atmospheric Environment, Institute of Urban Environment, Chinese Academy of Sciences, Xiamen, China

<sup>4</sup> Division of Environmental Health and Risk Management, School of Geography, Earth and Environmental Sciences, University of Birmingham, Edgbaston, Birmingham, B15 2TT, UK

<sup>5</sup> Institute of Surface Earth System Science, Tianjin University, Tianjin, 300072, China

<sup>6</sup> Department of Environmental Sciences / Center of Excellence in Environmental Studies, King Abdulaziz University, PO Box 80203, Jeddah, 21589, Saudi Arabia

<sup>7</sup> State Key Joint Laboratory of Environment Simulation and Pollution Control, School of Environment, Tsinghua University, Beijing 100084, China

\*Corresponding author

Mei Zheng, Ph.D

Tel: +86-10-62751285

Email: [mzheng@pku.edu.cn](mailto:mzheng@pku.edu.cn)

**Table S1 Average local contribution in four types of footprint**

| Types of footprint | Average local contribution |
|--------------------|----------------------------|
| Local              | $0.85 \pm 0.14$            |
| South              | $0.68 \pm 0.11$            |
| North              | $0.63 \pm 0.13$            |
| East               | $0.66 \pm 0.13$            |

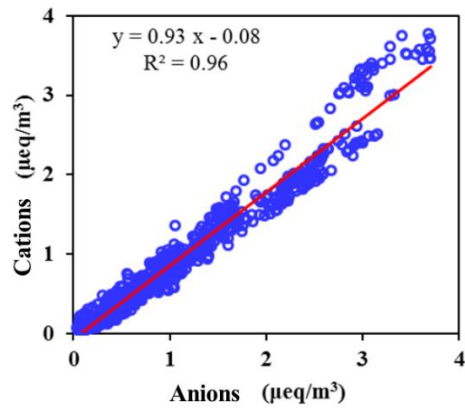

**Figure S1. Anion-cation balance of IGAC during the sampling period**

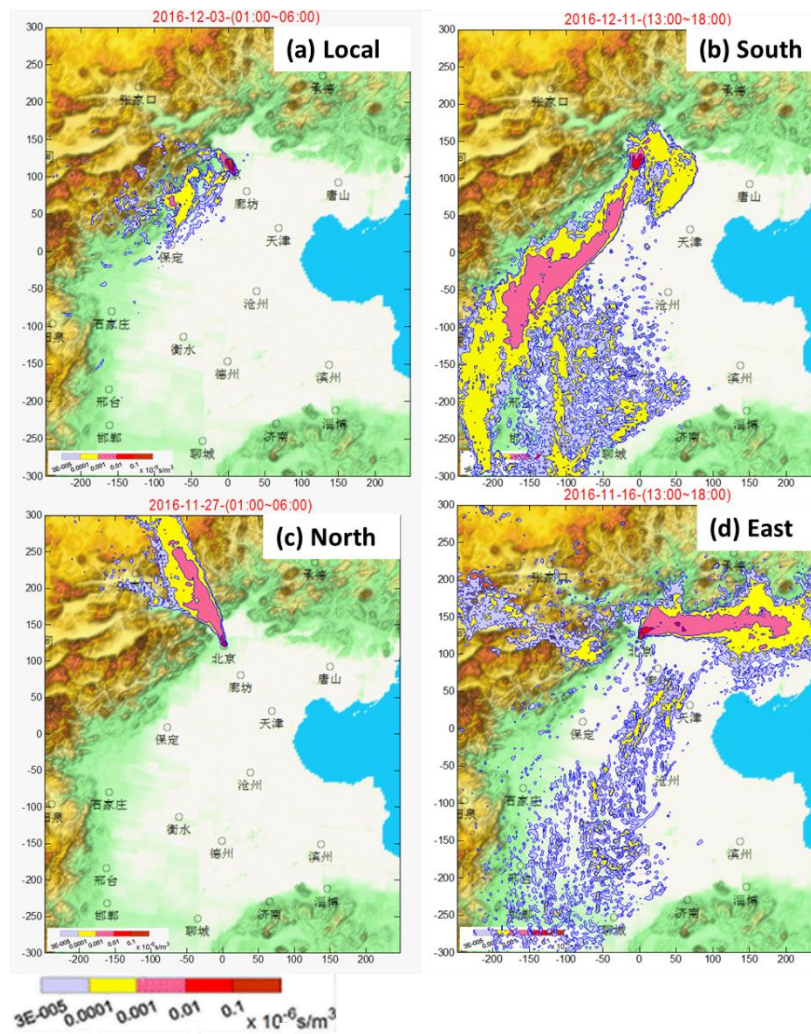

**Figure S2. Typical example of different types of footprint (N represents for number of cases. Local: N=79; South: N=45; North: N=51; East: N=30)**

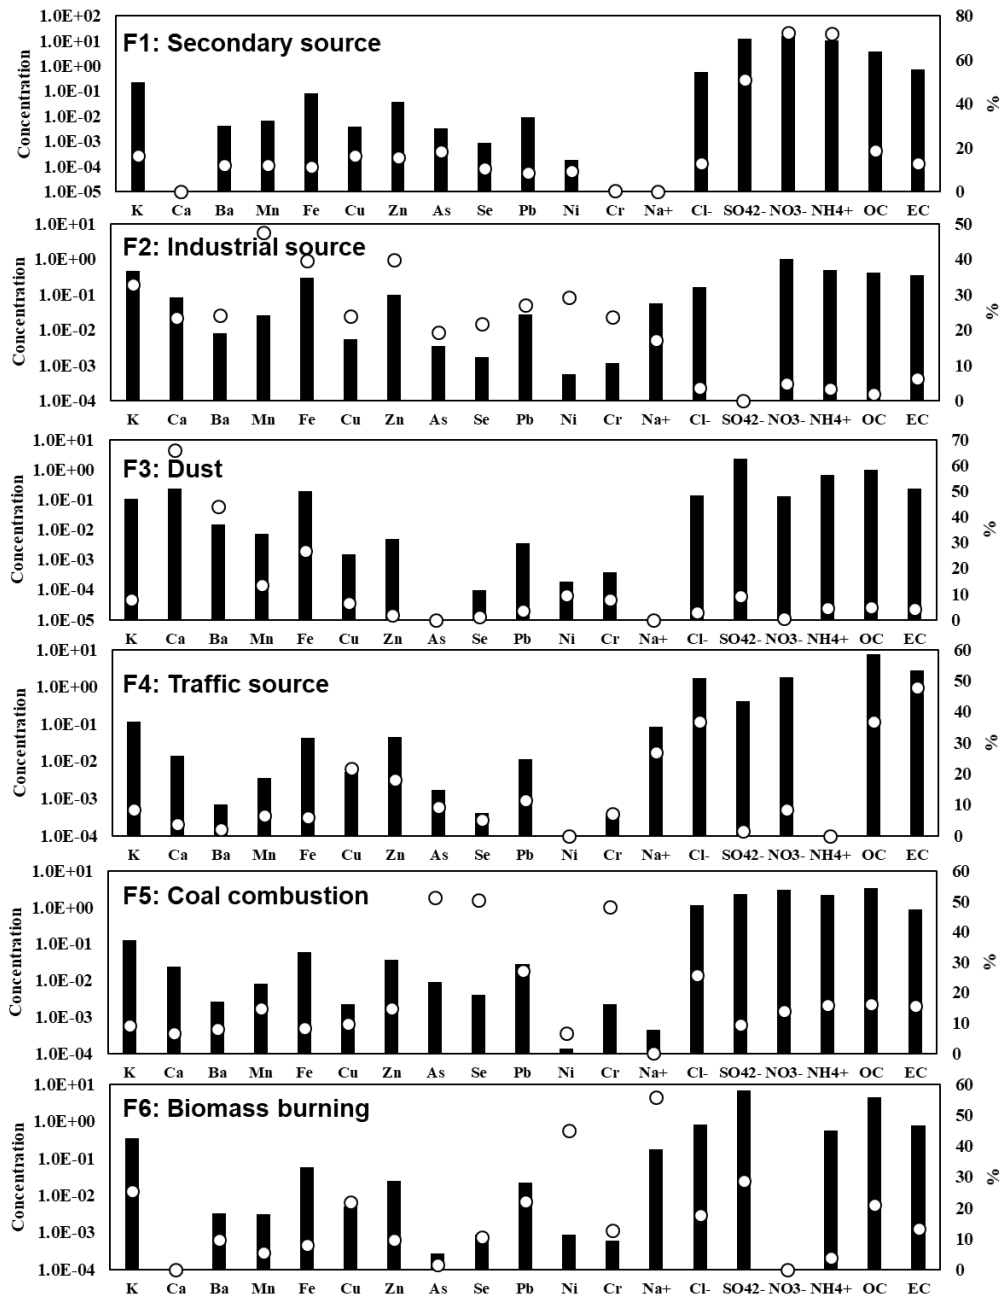

Fig S3. Source profiles of six factors by PMF

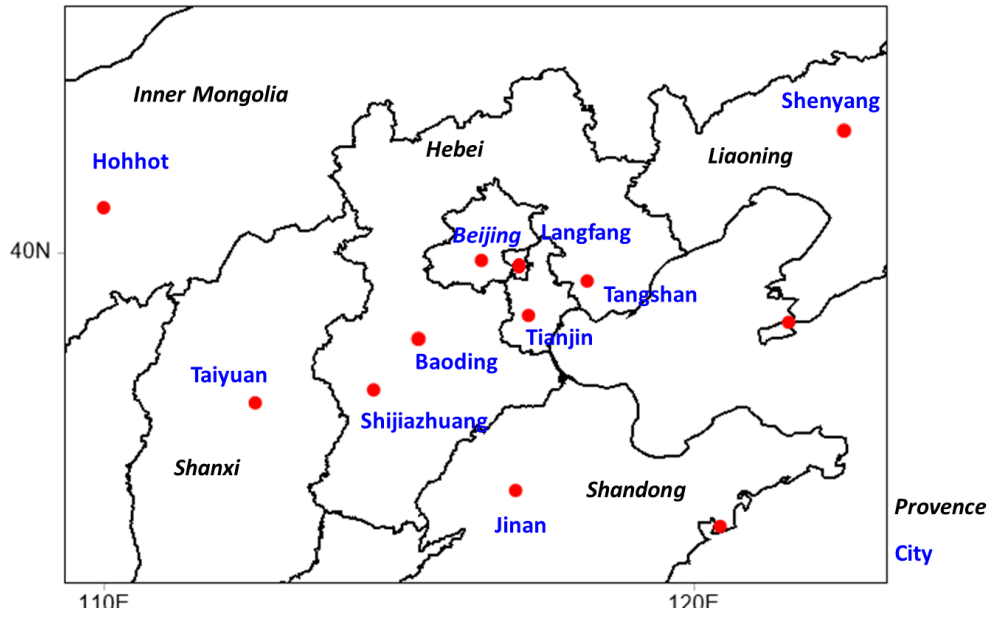

**Fig S4. Surrounding provinces and cities of Beijing**
